# Supplementary material for: New benzochromene-based compounds as potential EGFR-TK inhibitors: synthesis, anti-proliferative activity, molecular docking studies, and ADME profiles
Source: Royal Society of Chemistry journal article supplement (doi:10.1039/d6ra02423h), 2026-04-30

## Supplementary Data File

### 1. SWISSADME profiling of the synthesized candidates

| Cpds | Smiles                                                                                                      |
|------|-------------------------------------------------------------------------------------------------------------|
| 2    | <chem>N=C1C(C2C3=CC(OC)=C(OC)C=C3)=C(N=CN1)OC4=C2C5=C(C=C4)C=CC=C5</chem>                                   |
| 3    | <chem>OC1=C(C#N)C(C2=CC(OC)=C(OC)C=C2)C3=C(O1)C=CC4=C3C=CC=C4</chem>                                        |
| 4    | <chem>CCO/C=N/C1=C(C#N)C(C2=CC(OC)=C(OC)C=C2)C3=C(O1)C=CC4=C3C=CC=C4</chem>                                 |
| 5    | <chem>N=C1C(C2C3=CC(OC)=C(OC)C=C3)=C(N=CN1N)OC4=C2C5=C(C=C4)C=CC=C5</chem>                                  |
| 6    | <chem>N=C1C(C2C3=CC(OC)=C(OC)C=C3)=C(N=CN1NS(C4=CC=C(C)C=C4)(=O)=O)OC5=C2C6=C(C=C5)C=CC=C6</chem>           |
| 7    | <chem>N=C1C(C2C3=CC(OC)=C(OC)C=C3)=C(N=CN1C4=C(C)N(C)N(C5=CC=CC=C5)C4=O)OC6=C2C7=C(C=C6)C=CC=C7</chem>      |
| 8    | <chem>COC1=C(OC)C=CC(C2C(C3=NC4=O)=C(N=CN3N4)OC5=C2C6=C(C=C5)C=CC=C6)=C1</chem>                             |
| 9    | <chem>COC(C=C1)=C(OC)C=C1C2C(C3=NC(CC#N)=NN3C=N4)=C4OC5=C2C6=C(C=C5)C=CC=C6</chem>                          |
| 10   | <chem>COC(C=C1)=C(OC)C=C1C2C(C3=NC(/C(C#N)=C/C4=CC(OC)=C(OC)C=C4)=NN3C=N5)=C5OC6=C2C7=C(C=C6)C=CC=C7</chem> |

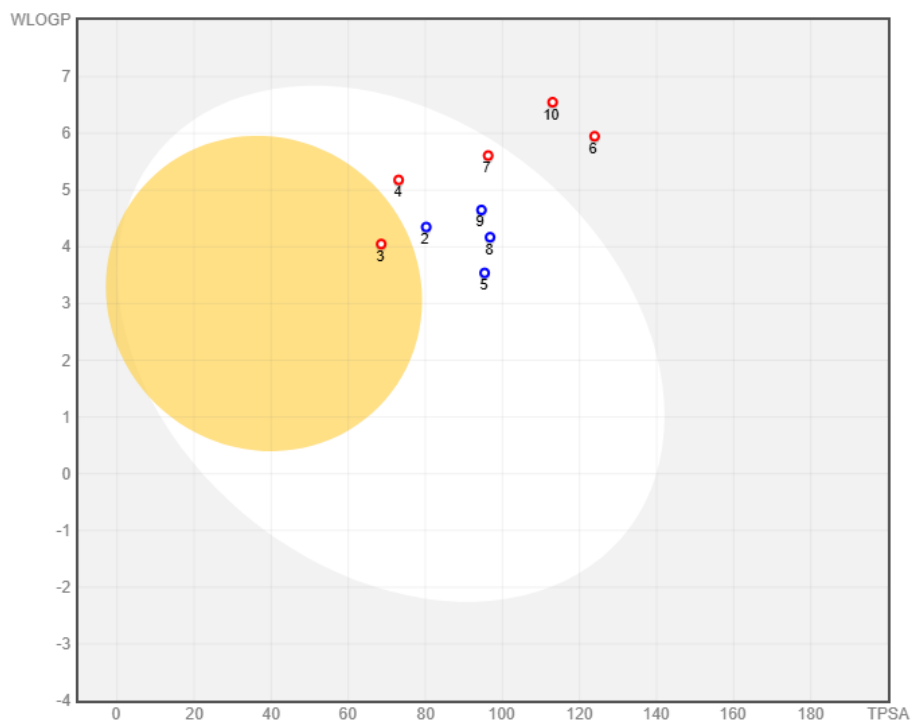

**Actions**

- Show Molecules Name

**Legends**

- BBB
- HIA
- PGP+
- PGP-

**Remarks**

None

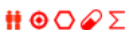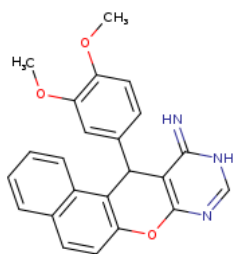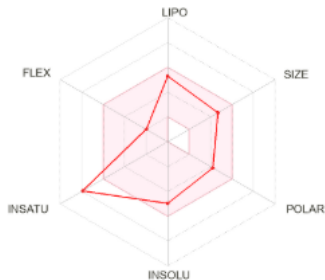

SMILES COc1ccc(cc1OC)C1c2c(nc[nH]c2=N)Oc2c1c1cccc1cc2

#### Physicochemical Properties

|                           |                                                               |
|---------------------------|---------------------------------------------------------------|
| Formula                   | C <sub>23</sub> H <sub>19</sub> N <sub>3</sub> O <sub>3</sub> |
| Molecular weight          | 385.42 g/mol                                                  |
| Num. heavy atoms          | 29                                                            |
| Num. arom. heavy atoms    | 22                                                            |
| Fraction Csp <sup>3</sup> | 0.13                                                          |
| Num. rotatable bonds      | 3                                                             |
| Num. H-bond acceptors     | 5                                                             |
| Num. H-bond donors        | 2                                                             |
| Molar Refractivity        | 109.62                                                        |
| TPSA <sup>2</sup>         | 80.22 Å <sup>2</sup>                                          |

#### Lipophilicity

|                                                       |      |
|-------------------------------------------------------|------|
| Log <i>P</i> <sub>o/w</sub> (iLOGP) <sup>2</sup>      | 2.83 |
| Log <i>P</i> <sub>o/w</sub> (XLOGP3) <sup>2</sup>     | 3.77 |
| Log <i>P</i> <sub>o/w</sub> (WLOGP) <sup>2</sup>      | 4.35 |
| Log <i>P</i> <sub>o/w</sub> (MLOGP) <sup>2</sup>      | 2.55 |
| Log <i>P</i> <sub>o/w</sub> (SILICOS-IT) <sup>2</sup> | 4.90 |
| Consensus Log <i>P</i> <sub>o/w</sub> <sup>2</sup>    | 3.68 |

#### Water Solubility

|                                 |                                 |
|---------------------------------|---------------------------------|
| Log S (ESOL) <sup>2</sup>       | -4.97                           |
| Solubility                      | 4.15e-03 mg/ml ; 1.08e-05 mol/l |
| Class <sup>2</sup>              | Moderately soluble              |
| Log S (Alii) <sup>2</sup>       | -5.15                           |
| Solubility                      | 2.74e-03 mg/ml ; 7.11e-06 mol/l |
| Class <sup>2</sup>              | Moderately soluble              |
| Log S (SILICOS-IT) <sup>2</sup> | -8.38                           |
| Solubility                      | 1.59e-06 mg/ml ; 4.12e-09 mol/l |
| Class <sup>2</sup>              | Poorly soluble                  |

#### Pharmacokinetics

|                                                          |            |
|----------------------------------------------------------|------------|
| GI absorption <sup>2</sup>                               | High       |
| BBB permeant <sup>2</sup>                                | No         |
| P-gp substrate <sup>2</sup>                              | Yes        |
| CYP1A2 inhibitor <sup>2</sup>                            | Yes        |
| CYP2C19 inhibitor <sup>2</sup>                           | Yes        |
| CYP2C9 inhibitor <sup>2</sup>                            | Yes        |
| CYP2D6 inhibitor <sup>2</sup>                            | Yes        |
| CYP3A4 inhibitor <sup>2</sup>                            | Yes        |
| Log <i>K</i> <sub>p</sub> (skin permeation) <sup>2</sup> | -5.97 cm/s |

#### Druglikeness

|                                    |                  |
|------------------------------------|------------------|
| Lipinski <sup>2</sup>              | Yes; 0 violation |
| Ghose <sup>2</sup>                 | Yes              |
| Veber <sup>2</sup>                 | Yes              |
| Egan <sup>2</sup>                  | Yes              |
| Muegge <sup>2</sup>                | Yes              |
| Bioavailability Score <sup>2</sup> | 0.55             |

#### Medicinal Chemistry

|                                      |                                      |
|--------------------------------------|--------------------------------------|
| PAINS <sup>2</sup>                   | 0 alert                              |
| Brenk <sup>2</sup>                   | 0 alert                              |
| Leadlikeness <sup>2</sup>            | No; 2 violations: MW>350, XLOGP3>3.5 |
| Synthetic accessibility <sup>2</sup> | 4.02                                 |

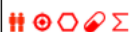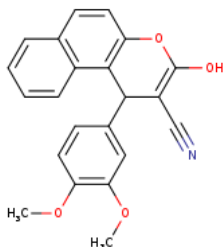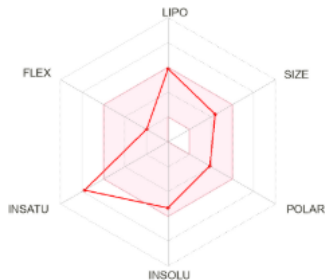

SMILES N#CC1=C(O)Oc2c(C1c1ccc(cc1)OC)OC)c1ccccc1cc2

#### Physicochemical Properties

|                        |              |
|------------------------|--------------|
| Formula                | C22H17NO4    |
| Molecular weight       | 359.37 g/mol |
| Num. heavy atoms       | 27           |
| Num. arom. heavy atoms | 16           |
| Fraction Csp3          | 0.14         |
| Num. rotatable bonds   | 3            |
| Num. H-bond acceptors  | 5            |
| Num. H-bond donors     | 1            |
| Molar Refractivity     | 101.22       |
| TPSA                   | 71.71 Å²     |

#### Lipophilicity

|                            |      |
|----------------------------|------|
| Log $P_{o/w}$ (iLOGP)      | 2.90 |
| Log $P_{o/w}$ (XLOGP3)     | 4.81 |
| Log $P_{o/w}$ (WLOGP)      | 4.67 |
| Log $P_{o/w}$ (MLOGP)      | 2.22 |
| Log $P_{o/w}$ (SILICOS-IT) | 4.02 |
| Consensus Log $P_{o/w}$    | 3.72 |

#### Water Solubility

|                    |                                 |
|--------------------|---------------------------------|
| Log S (ESOL)       | -5.34                           |
| Solubility         | 1.65e-03 mg/ml ; 4.58e-06 mol/l |
| Class              | Moderately soluble              |
| Log S (Ali)        | -6.05                           |
| Solubility         | 3.21e-04 mg/ml ; 8.94e-07 mol/l |
| Class              | Poorly soluble                  |
| Log S (SILICOS-IT) | -6.62                           |
| Solubility         | 8.60e-05 mg/ml ; 2.39e-07 mol/l |
| Class              | Poorly soluble                  |

#### Pharmacokinetics

|                             |            |
|-----------------------------|------------|
| GI absorption               | High       |
| BBB permeant                | No         |
| P-gp substrate              | No         |
| CYP1A2 inhibitor            | Yes        |
| CYP2C19 inhibitor           | Yes        |
| CYP2C9 inhibitor            | Yes        |
| CYP2D6 inhibitor            | No         |
| CYP3A4 inhibitor            | Yes        |
| Log $K_p$ (skin permeation) | -5.08 cm/s |

#### Druglikeness

|                       |                  |
|-----------------------|------------------|
| Lipinski              | Yes; 0 violation |
| Ghose                 | Yes              |
| Veber                 | Yes              |
| Egan                  | Yes              |
| Muegge                | Yes              |
| Bioavailability Score | 0.55             |

#### Medicinal Chemistry

|                         |                                      |
|-------------------------|--------------------------------------|
| PAINS                   | 0 alert                              |
| Brenk                   | 0 alert                              |
| Leadlikeness            | No; 2 violations: MW>350, XLOGP3>3.5 |
| Synthetic accessibility | 3.97                                 |

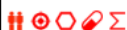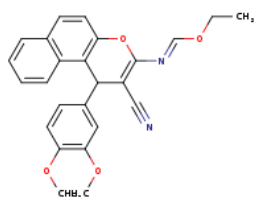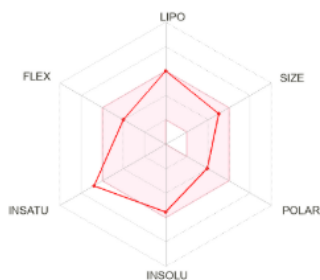

SMILES CCO/C=N/C1=C(C#N)C(c2c(O1)ccc1c2cccc1)c1ccc(c(c1)OC)OC

#### Physicochemical Properties

|                           |                                                               |
|---------------------------|---------------------------------------------------------------|
| Formula                   | C <sub>25</sub> H <sub>22</sub> N <sub>2</sub> O <sub>4</sub> |
| Molecular weight          | 414.45 g/mol                                                  |
| Num. heavy atoms          | 31                                                            |
| Num. arom. heavy atoms    | 16                                                            |
| Fraction Csp <sup>3</sup> | 0.20                                                          |
| Num. rotatable bonds      | 6                                                             |
| Num. H-bond acceptors     | 6                                                             |
| Num. H-bond donors        | 0                                                             |
| Molar Refractivity        | 118.84                                                        |
| TPSA                      | 73.07 Å <sup>2</sup>                                          |

#### Lipophilicity

|                            |      |
|----------------------------|------|
| Log $P_{o/w}$ (iLOGP)      | 4.07 |
| Log $P_{o/w}$ (XLOGP3)     | 5.03 |
| Log $P_{o/w}$ (WLOGP)      | 5.18 |
| Log $P_{o/w}$ (MLOGP)      | 2.78 |
| Log $P_{o/w}$ (SILICOS-IT) | 5.36 |
| Consensus Log $P_{o/w}$    | 4.48 |

#### Water Solubility

|                    |                                 |
|--------------------|---------------------------------|
| Log S (ESOL)       | -5.56                           |
| Solubility         | 1.13e-03 mg/ml ; 2.73e-06 mol/l |
| Class              | Moderately soluble              |
| Log S (Alii)       | -6.31                           |
| Solubility         | 2.05e-04 mg/ml ; 4.95e-07 mol/l |
| Class              | Poorly soluble                  |
| Log S (SILICOS-IT) | -7.78                           |
| Solubility         | 6.93e-06 mg/ml ; 1.67e-08 mol/l |
| Class              | Poorly soluble                  |

#### Pharmacokinetics

|                             |            |
|-----------------------------|------------|
| GI absorption               | High       |
| BBB permeant                | No         |
| P-gp substrate              | No         |
| CYP1A2 inhibitor            | No         |
| CYP2C19 inhibitor           | Yes        |
| CYP2C9 inhibitor            | Yes        |
| CYP2D6 inhibitor            | No         |
| CYP3A4 inhibitor            | Yes        |
| Log $K_p$ (skin permeation) | -5.26 cm/s |

#### Druglikeness

|                       |                           |
|-----------------------|---------------------------|
| Lipinski              | Yes; 0 violation          |
| Ghose                 | Yes                       |
| Weber                 | Yes                       |
| Egan                  | Yes                       |
| Muegge                | No; 1 violation: XLOGP3>5 |
| Bioavailability Score | 0.55                      |

#### Medicinal Chemistry

|                         |                                      |
|-------------------------|--------------------------------------|
| PAINS                   | 0 alert                              |
| Brenk                   | 2 alerts: imine_1, imine_2           |
| Leadlikeness            | No; 2 violations: MW>350, XLOGP3>3.5 |
| Synthetic accessibility | 4.54                                 |

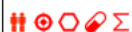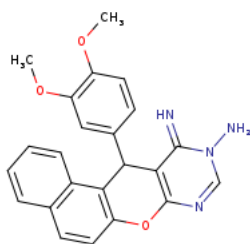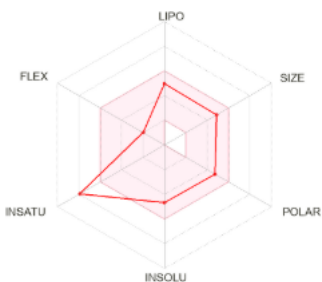

SMILES COC1ccc(cc1OC)C1c2c(ncn(c2=N)N)Oc2c1c1cccc1cc2

#### Physicochemical Properties

|                           |                                                               |
|---------------------------|---------------------------------------------------------------|
| Formula                   | C <sub>23</sub> H <sub>20</sub> N <sub>4</sub> O <sub>3</sub> |
| Molecular weight          | 400.43 g/mol                                                  |
| Num. heavy atoms          | 30                                                            |
| Num. arom. heavy atoms    | 22                                                            |
| Fraction Csp <sup>3</sup> | 0.13                                                          |
| Num. rotatable bonds      | 3                                                             |
| Num. H-bond acceptors     | 5                                                             |
| Num. H-bond donors        | 2                                                             |
| Molar Refractivity        | 113.40                                                        |
| TPSA                      | 95.38 Å <sup>2</sup>                                          |

#### Lipophilicity

|                                          |      |
|------------------------------------------|------|
| Log <i>P</i> <sub>o/w</sub> (iLOGP)      | 2.75 |
| Log <i>P</i> <sub>o/w</sub> (XLOGP3)     | 3.21 |
| Log <i>P</i> <sub>o/w</sub> (WLOGP)      | 3.54 |
| Log <i>P</i> <sub>o/w</sub> (MLOGP)      | 2.84 |
| Log <i>P</i> <sub>o/w</sub> (SILICOS-IT) | 3.13 |
| Consensus Log <i>P</i> <sub>o/w</sub>    | 3.09 |

#### Water Solubility

|                    |                                 |
|--------------------|---------------------------------|
| Log S (ESOL)       | -4.69                           |
| Solubility         | 8.18e-03 mg/ml ; 2.04e-05 mol/l |
| Class              | Moderately soluble              |
| Log S (Ali)        | -4.89                           |
| Solubility         | 5.22e-03 mg/ml ; 1.30e-05 mol/l |
| Class              | Moderately soluble              |
| Log S (SILICOS-IT) | -7.19                           |
| Solubility         | 2.59e-05 mg/ml ; 6.47e-08 mol/l |
| Class              | Poorly soluble                  |

#### Pharmacokinetics

|                                             |            |
|---------------------------------------------|------------|
| GI absorption                               | High       |
| BBB permeant                                | No         |
| P-gp substrate                              | Yes        |
| CYP1A2 inhibitor                            | No         |
| CYP2C19 inhibitor                           | Yes        |
| CYP2C9 inhibitor                            | Yes        |
| CYP2D6 inhibitor                            | Yes        |
| CYP3A4 inhibitor                            | No         |
| Log <i>K</i> <sub>p</sub> (skin permeation) | -6.46 cm/s |

#### Druglikeness

|                       |                  |
|-----------------------|------------------|
| Lipinski              | Yes; 0 violation |
| Ghose                 | Yes              |
| Veber                 | Yes              |
| Egan                  | Yes              |
| Muegge                | Yes              |
| Bioavailability Score | 0.55             |

#### Medicinal Chemistry

|                         |                         |
|-------------------------|-------------------------|
| PAINS                   | 0 alert                 |
| Brenk                   | 0 alert                 |
| Leadlikeness            | No; 1 violation: MW>350 |
| Synthetic accessibility | 4.23                    |

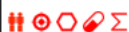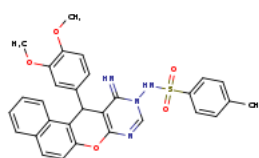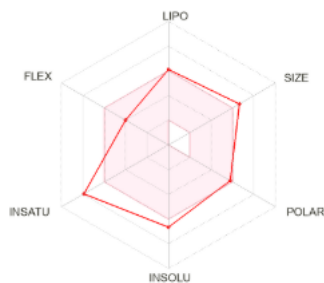

SMILES COc1ccc(cc1OC)C1c2c(ncn(c2=N)NS(=O)(=O)c2ccc(cc2)C)Oc2c1c1cccc1cc2

#### Physicochemical Properties

|                        |                       |
|------------------------|-----------------------|
| Formula                | C30H26N4O5S           |
| Molecular weight       | 554.62 g/mol          |
| Num. heavy atoms       | 40                    |
| Num. arom. heavy atoms | 28                    |
| Fraction Csp3          | 0.13                  |
| Num. rotatable bonds   | 6                     |
| Num. H-bond acceptors  | 7                     |
| Num. H-bond donors     | 2                     |
| Molar Refractivity     | 151.07                |
| TPSA <sup>2</sup>      | 123.91 Å <sup>2</sup> |

#### Lipophilicity

|                                         |      |
|-----------------------------------------|------|
| Log $P_{o/w}$ (iLOGP) <sup>2</sup>      | 3.49 |
| Log $P_{o/w}$ (XLOGP3) <sup>2</sup>     | 5.17 |
| Log $P_{o/w}$ (WLOGP) <sup>2</sup>      | 5.95 |
| Log $P_{o/w}$ (MLOGP) <sup>2</sup>      | 3.42 |
| Log $P_{o/w}$ (SILICOS-IT) <sup>2</sup> | 3.99 |
| Consensus Log $P_{o/w}$ <sup>2</sup>    | 4.40 |

#### Water Solubility

|                                 |                                 |
|---------------------------------|---------------------------------|
| Log S (ESOL) <sup>2</sup>       | -6.66                           |
| Solubility                      | 1.22e-04 mg/ml ; 2.20e-07 mol/l |
| Class <sup>2</sup>              | Poorly soluble                  |
| Log S (Ali) <sup>2</sup>        | -7.52                           |
| Solubility                      | 1.68e-05 mg/ml ; 3.03e-08 mol/l |
| Class <sup>2</sup>              | Poorly soluble                  |
| Log S (SILICOS-IT) <sup>2</sup> | -10.26                          |
| Solubility                      | 3.02e-08 mg/ml ; 5.45e-11 mol/l |
| Class <sup>2</sup>              | Insoluble                       |

#### Pharmacokinetics

|                                          |            |
|------------------------------------------|------------|
| GI absorption <sup>2</sup>               | Low        |
| BBB permeant <sup>2</sup>                | No         |
| P-gp substrate <sup>2</sup>              | No         |
| CYP1A2 inhibitor <sup>2</sup>            | No         |
| CYP2C19 inhibitor <sup>2</sup>           | No         |
| CYP2C9 inhibitor <sup>2</sup>            | Yes        |
| CYP2D6 inhibitor <sup>2</sup>            | No         |
| CYP3A4 inhibitor <sup>2</sup>            | No         |
| Log $K_p$ (skin permeation) <sup>2</sup> | -6.01 cm/s |

#### Druglikeness

|                                    |                                             |
|------------------------------------|---------------------------------------------|
| Lipinski <sup>2</sup>              | Yes; 1 violation: MW>500                    |
| Ghose <sup>2</sup>                 | No; 3 violations: MW>480, WLOGP>5.6, MR>130 |
| Veber <sup>2</sup>                 | Yes                                         |
| Egan <sup>2</sup>                  | No; 1 violation: WLOGP>5.88                 |
| Muegge <sup>2</sup>                | No; 1 violation: XLOGP3>5                   |
| Bioavailability Score <sup>2</sup> | 0.55                                        |

#### Medicinal Chemistry

|                                      |                                      |
|--------------------------------------|--------------------------------------|
| PAINS <sup>2</sup>                   | 0 alert                              |
| Brenk <sup>2</sup>                   | 0 alert                              |
| Leadlikeness <sup>2</sup>            | No; 2 violations: MW>350, XLOGP3>3.5 |
| Synthetic accessibility <sup>2</sup> | 4.91                                 |

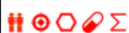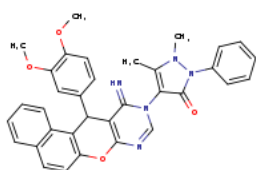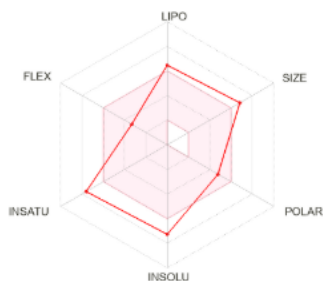

SMILES COc1cc(ccc1OC)C1c2c(ccc3c2cccc3)Oc2c1c(=N)n(cn2)c1c(C)n(c1=O)c1cccc1C

#### Physicochemical Properties

|                        |              |
|------------------------|--------------|
| Formula                | C34H29N5O4   |
| Molecular weight       | 571.63 g/mol |
| Num. heavy atoms       | 43           |
| Num. arom. heavy atoms | 33           |
| Fraction Csp3          | 0.15         |
| Num. rotatable bonds   | 5            |
| Num. H-bond acceptors  | 6            |
| Num. H-bond donors     | 1            |
| Molar Refractivity     | 164.41       |
| TPSA                   | 96.29 Å²     |

#### Lipophilicity

|                            |      |
|----------------------------|------|
| Log $P_{o/w}$ (iLOGP)      | 4.46 |
| Log $P_{o/w}$ (XLOGP3)     | 5.78 |
| Log $P_{o/w}$ (WLOGP)      | 5.61 |
| Log $P_{o/w}$ (MLOGP)      | 4.07 |
| Log $P_{o/w}$ (SILICOS-IT) | 4.99 |
| Consensus Log $P_{o/w}$    | 4.98 |

#### Water Solubility

|                    |                                 |
|--------------------|---------------------------------|
| Log S (ESOL)       | -7.26                           |
| Solubility         | 3.12e-05 mg/ml ; 5.45e-08 mol/l |
| Class              | Poorly soluble                  |
| Log S (Ali)        | -7.57                           |
| Solubility         | 1.53e-05 mg/ml ; 2.68e-08 mol/l |
| Class              | Poorly soluble                  |
| Log S (SILICOS-IT) | -10.26                          |
| Solubility         | 3.11e-08 mg/ml ; 5.45e-11 mol/l |
| Class              | Insoluble                       |

#### Pharmacokinetics

|                             |            |
|-----------------------------|------------|
| GI absorption               | High       |
| BBB permeant                | No         |
| P-gp substrate              | No         |
| CYP1A2 inhibitor            | No         |
| CYP2C19 inhibitor           | No         |
| CYP2C9 inhibitor            | Yes        |
| CYP2D6 inhibitor            | No         |
| CYP3A4 inhibitor            | No         |
| Log $K_p$ (skin permeation) | -5.68 cm/s |

#### Druglikeness

|                       |                                                        |
|-----------------------|--------------------------------------------------------|
| Lipinski              | Yes; 1 violation: MW>500                               |
| Ghose                 | No; 4 violations: MW>480, WLOGP>5.6, MR>130, #atoms>70 |
| Veber                 | Yes                                                    |
| Egan                  | Yes                                                    |
| Muegge                | No; 1 violation: XLOGP3>5                              |
| Bioavailability Score | 0.55                                                   |

#### Medicinal Chemistry

|                         |                                      |
|-------------------------|--------------------------------------|
| PAINS                   | 0 alert                              |
| Brenk                   | 0 alert                              |
| Leadlikeness            | No; 2 violations: MW>350, XLOGP3>3.5 |
| Synthetic accessibility | 5.08                                 |

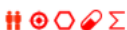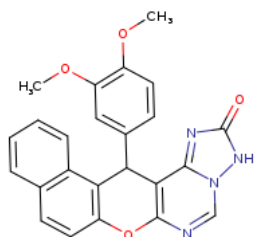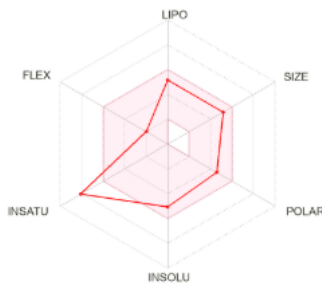

SMILES Cc1ccc(cc1OC)C1c2c(ccc3c2ccc3)Oc2c1c1nc(=O)[nH]n1cn2

#### Physicochemical Properties

|                        |                      |
|------------------------|----------------------|
| Formula                | C24H18N4O4           |
| Molecular weight       | 426.42 g/mol         |
| Num. heavy atoms       | 32                   |
| Num. arom. heavy atoms | 25                   |
| Fraction Csp3          | 0.12                 |
| Num. rotatable bonds   | 3                    |
| Num. H-bond acceptors  | 6                    |
| Num. H-bond donors     | 1                    |
| Molar Refractivity     | 118.11               |
| TPSA                   | 90.74 Å <sup>2</sup> |

#### Lipophilicity

|                            |      |
|----------------------------|------|
| Log $P_{o/w}$ (ILOGP)      | 2.76 |
| Log $P_{o/w}$ (XLOGP3)     | 3.52 |
| Log $P_{o/w}$ (WLOGP)      | 3.87 |
| Log $P_{o/w}$ (MLOGP)      | 2.79 |
| Log $P_{o/w}$ (SILICOS-IT) | 3.64 |
| Consensus Log $P_{o/w}$    | 3.32 |

#### Water Solubility

|                    |                                 |
|--------------------|---------------------------------|
| Log S (ESOL)       | -5.08                           |
| Solubility         | 3.53e-03 mg/ml ; 8.29e-06 mol/l |
| Class              | Moderately soluble              |
| Log S (Ali)        | -5.11                           |
| Solubility         | 3.31e-03 mg/ml ; 7.77e-06 mol/l |
| Class              | Moderately soluble              |
| Log S (SILICOS-IT) | -7.89                           |
| Solubility         | 5.46e-06 mg/ml ; 1.28e-08 mol/l |
| Class              | Poorly soluble                  |

#### Pharmacokinetics

|                             |            |
|-----------------------------|------------|
| GI absorption               | High       |
| BBB permeant                | No         |
| P-gp substrate              | Yes        |
| CYP1A2 inhibitor            | No         |
| CYP2C19 inhibitor           | No         |
| CYP2C9 inhibitor            | Yes        |
| CYP2D6 inhibitor            | Yes        |
| CYP3A4 inhibitor            | No         |
| Log $K_p$ (skin permeation) | -6.40 cm/s |

#### Druglikeness

|                       |                  |
|-----------------------|------------------|
| Lipinski              | Yes; 0 violation |
| Ghose                 | Yes              |
| Veber                 | Yes              |
| Egan                  | Yes              |
| Muegge                | Yes              |
| Bioavailability Score | 0.55             |

#### Medicinal Chemistry

|                         |                                      |
|-------------------------|--------------------------------------|
| PAINS                   | 0 alert                              |
| Brenk                   | 0 alert                              |
| Leadlikeness            | No; 2 violations: MW>350, XLOGP3>3.5 |
| Synthetic accessibility | 3.97                                 |

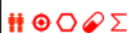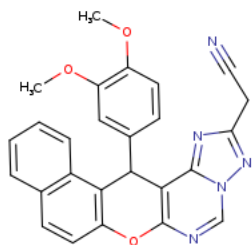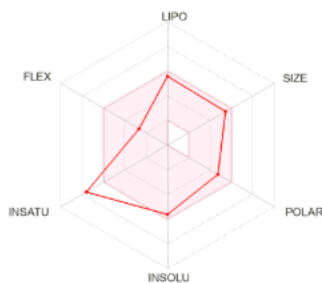

SMILES N#CCc1nn2c(n1)c1c(nc2)Oc2c(C1c1ccc(c(c1)OC)OC)c1ccccc1cc2

#### Physicochemical Properties

|                           |                                                               |
|---------------------------|---------------------------------------------------------------|
| Formula                   | C <sub>26</sub> H <sub>19</sub> N <sub>5</sub> O <sub>3</sub> |
| Molecular weight          | 449.46 g/mol                                                  |
| Num. heavy atoms          | 34                                                            |
| Num. arom. heavy atoms    | 25                                                            |
| Fraction Csp <sup>3</sup> | 0.15                                                          |
| Num. rotatable bonds      | 4                                                             |
| Num. H-bond acceptors     | 7                                                             |
| Num. H-bond donors        | 0                                                             |
| Molar Refractivity        | 124.81                                                        |
| TPSA                      | 94.56 Å <sup>2</sup>                                          |

#### Lipophilicity

|                                          |      |
|------------------------------------------|------|
| Log <i>P</i> <sub>o/w</sub> (iLOGP)      | 3.28 |
| Log <i>P</i> <sub>o/w</sub> (XLOGP3)     | 4.30 |
| Log <i>P</i> <sub>o/w</sub> (WLOGP)      | 4.65 |
| Log <i>P</i> <sub>o/w</sub> (MLOGP)      | 2.80 |
| Log <i>P</i> <sub>o/w</sub> (SILICOS-IT) | 3.93 |
| Consensus Log <i>P</i> <sub>o/w</sub>    | 3.79 |

#### Water Solubility

|                    |                                 |
|--------------------|---------------------------------|
| Log S (ESOL)       | -5.62                           |
| Solubility         | 1.09e-03 mg/ml ; 2.42e-06 mol/l |
| Class              | Moderately soluble              |
| Log S (Ali)        | -6.00                           |
| Solubility         | 4.50e-04 mg/ml ; 1.00e-06 mol/l |
| Class              | Moderately soluble              |
| Log S (SILICOS-IT) | -8.46                           |
| Solubility         | 1.58e-06 mg/ml ; 3.51e-09 mol/l |
| Class              | Poorly soluble                  |

#### Pharmacokinetics

|                                             |            |
|---------------------------------------------|------------|
| GI absorption                               | High       |
| BBB permeant                                | No         |
| P-gp substrate                              | Yes        |
| CYP1A2 inhibitor                            | Yes        |
| CYP2C19 inhibitor                           | No         |
| CYP2C9 inhibitor                            | Yes        |
| CYP2D6 inhibitor                            | No         |
| CYP3A4 inhibitor                            | Yes        |
| Log <i>K</i> <sub>p</sub> (skin permeation) | -5.99 cm/s |

#### Druglikeness

|                       |                  |
|-----------------------|------------------|
| Lipinski              | Yes; 0 violation |
| Ghose                 | Yes              |
| Veber                 | Yes              |
| Egan                  | Yes              |
| Muegge                | Yes              |
| Bioavailability Score | 0.55             |

#### Medicinal Chemistry

|                         |                                      |
|-------------------------|--------------------------------------|
| PAINS                   | 0 alert                              |
| Brenk                   | 0 alert                              |
| Leadlikeness            | No; 2 violations: MW>350, XLOGP3>3.5 |
| Synthetic accessibility | 4.15                                 |

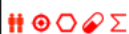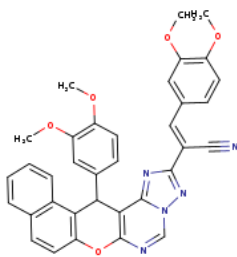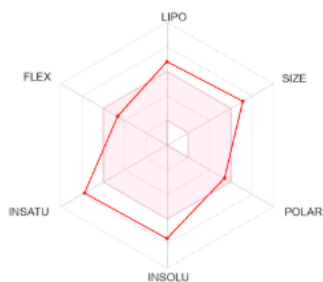

SMILES N#C/C(=C/c1ccc(c(c1)OC)OC)/c1nc2n(n1)cnc1c2C(c2ccc(c(c2)OC)OC)c2c(O1)ccc1c2cccc1

#### Physicochemical Properties

|                        |                       |
|------------------------|-----------------------|
| Formula                | C35H27N5O5            |
| Molecular weight       | 597.62 g/mol          |
| Num. heavy atoms       | 45                    |
| Num. arom. heavy atoms | 31                    |
| Fraction Csp3          | 0.14                  |
| Num. rotatable bonds   | 7                     |
| Num. H-bond acceptors  | 9                     |
| Num. H-bond donors     | 0                     |
| Molar Refractivity     | 168.20                |
| TPSA <sup>2</sup>      | 113.02 Å <sup>2</sup> |

#### Lipophilicity

|                                         |      |
|-----------------------------------------|------|
| Log $P_{o/w}$ (iLOGP) <sup>2</sup>      | 4.65 |
| Log $P_{o/w}$ (XLOGP3) <sup>2</sup>     | 6.36 |
| Log $P_{o/w}$ (WLOGP) <sup>2</sup>      | 6.55 |
| Log $P_{o/w}$ (MLOGP) <sup>2</sup>      | 3.24 |
| Log $P_{o/w}$ (SILICOS-IT) <sup>2</sup> | 5.57 |
| Consensus Log $P_{o/w}$ <sup>2</sup>    | 5.27 |

#### Water Solubility

|                                 |                                 |
|---------------------------------|---------------------------------|
| Log S (ESOL) <sup>2</sup>       | -7.60                           |
| Solubility                      | 1.50e-05 mg/ml ; 2.51e-08 mol/l |
| Class <sup>2</sup>              | Poorly soluble                  |
| Log S (Ali) <sup>2</sup>        | -8.52                           |
| Solubility                      | 1.79e-06 mg/ml ; 2.99e-09 mol/l |
| Class <sup>2</sup>              | Poorly soluble                  |
| Log S (SILICOS-IT) <sup>2</sup> | -10.74                          |
| Solubility                      | 1.10e-08 mg/ml ; 1.83e-11 mol/l |
| Class <sup>2</sup>              | Insoluble                       |

#### Pharmacokinetics

|                                          |            |
|------------------------------------------|------------|
| GI absorption <sup>2</sup>               | Low        |
| BBB permeant <sup>2</sup>                | No         |
| P-gp substrate <sup>2</sup>              | No         |
| CYP1A2 inhibitor <sup>2</sup>            | No         |
| CYP2C19 inhibitor <sup>2</sup>           | No         |
| CYP2C9 inhibitor <sup>2</sup>            | Yes        |
| CYP2D6 inhibitor <sup>2</sup>            | No         |
| CYP3A4 inhibitor <sup>2</sup>            | Yes        |
| Log $K_p$ (skin permeation) <sup>2</sup> | -5.43 cm/s |

#### Druglikeness

|                                    |                                                        |
|------------------------------------|--------------------------------------------------------|
| Lipinski <sup>2</sup>              | Yes; 1 violation: MW>500                               |
| Ghose <sup>2</sup>                 | No; 4 violations: MW>480, WLOGP>5.6, MR>130, #atoms>70 |
| Veber <sup>2</sup>                 | Yes                                                    |
| Egan <sup>2</sup>                  | No; 1 violation: WLOGP>5.88                            |
| Muegge <sup>2</sup>                | No; 1 violation: XLOGP3>5                              |
| Bioavailability Score <sup>2</sup> | 0.55                                                   |

#### Medicinal Chemistry

|                                      |                                                |
|--------------------------------------|------------------------------------------------|
| PAINS <sup>2</sup>                   | 0 alert                                        |
| Brenk <sup>2</sup>                   | 1 alert: conjugated_nitrile_group <sup>2</sup> |
| Leadlikeness <sup>2</sup>            | No; 2 violations: MW>350, XLOGP3>3.5           |
| Synthetic accessibility <sup>2</sup> | 5.13                                           |

Detailed 2D and 3D interaction diagrams of the synthesized compounds derivatives docked to EGFR tyrosine kinase (PDB ID: 4HJO). Comparisons include binding interactions of each derivative alongside the reference inhibitor doxorubicin and the co-crystallized ligand (AQ4). Notably, many of the derivatives exhibit interaction profiles that closely resemble those of the co-crystallized ligand, supporting the reliability and accuracy of the docking protocol. The diagrams highlight hydrogen bonding,  $\pi$ -interactions, ionic contacts, and other key molecular interactions within the active site environments.

2

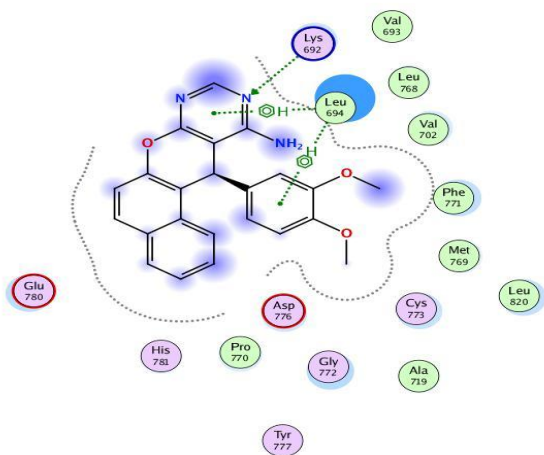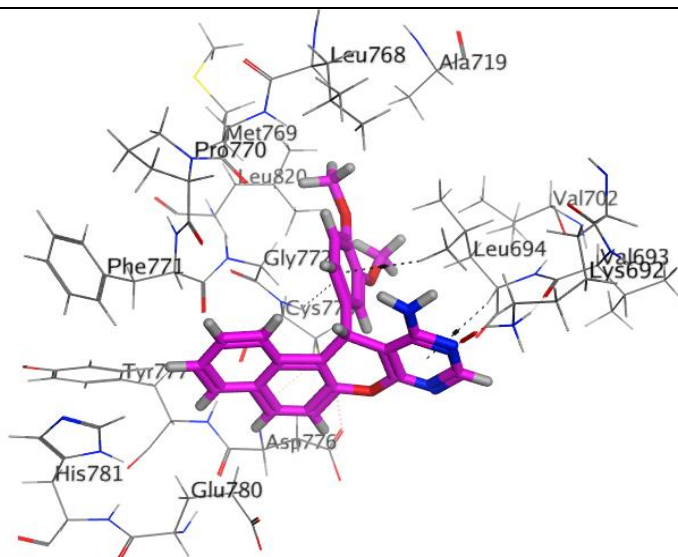

3

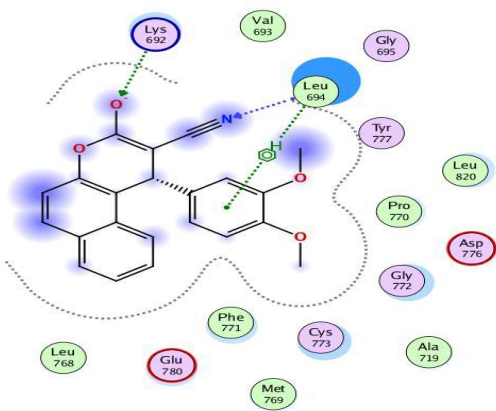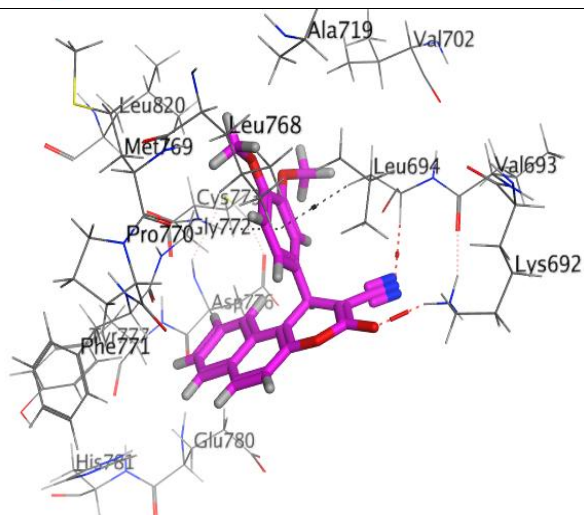

4

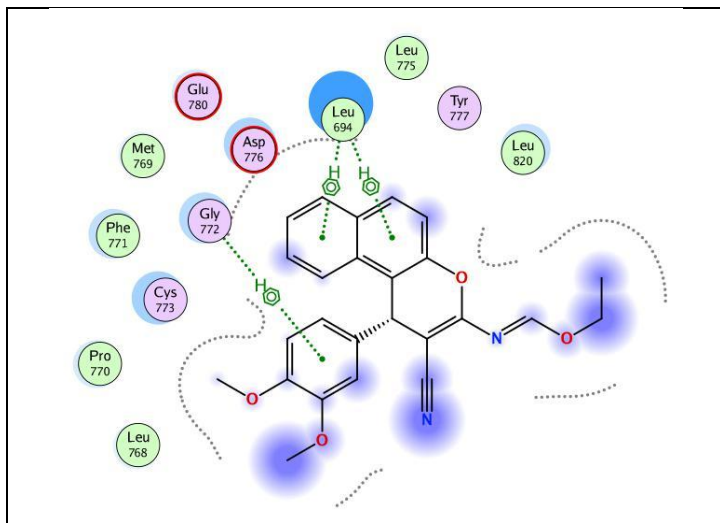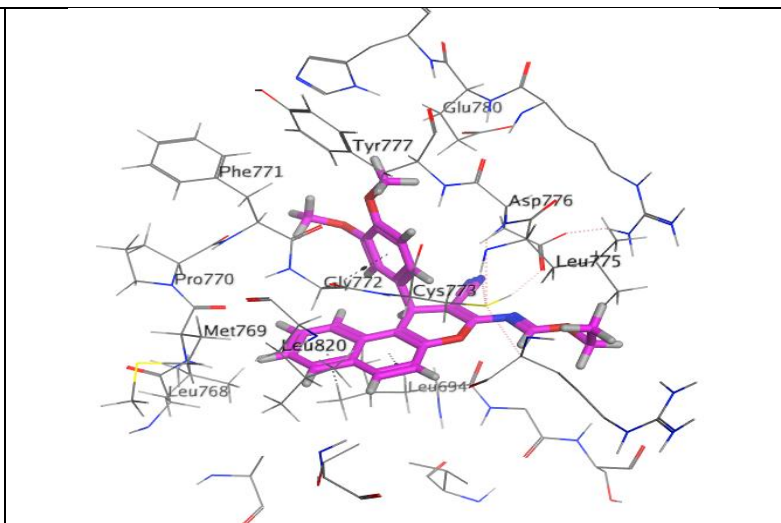

5

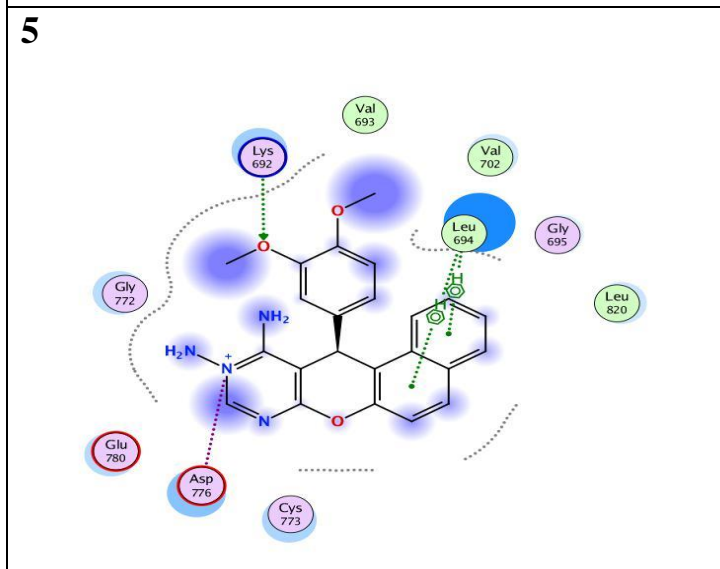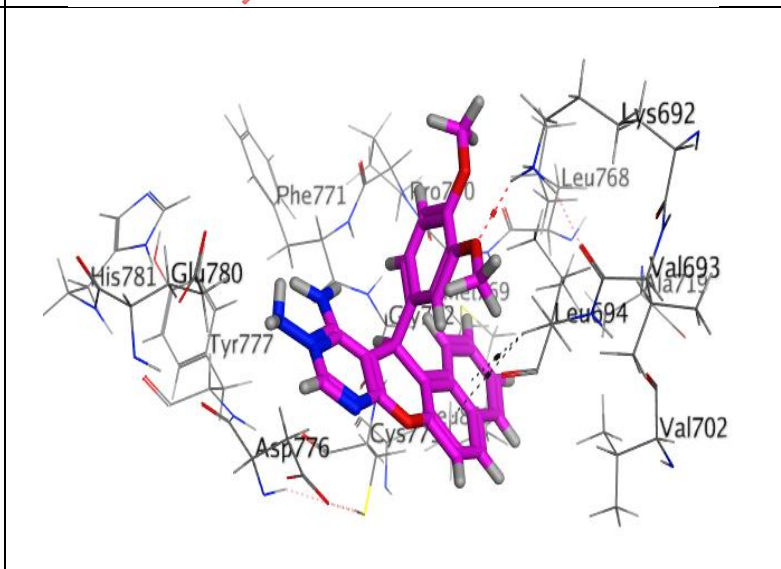

6

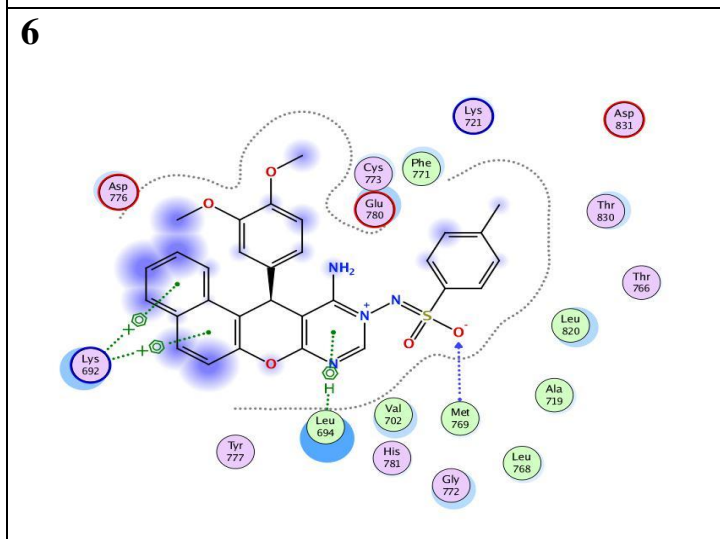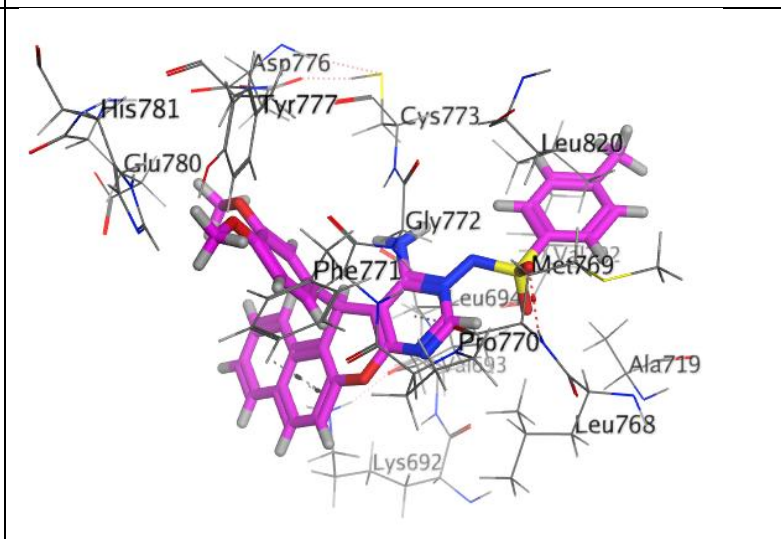

7

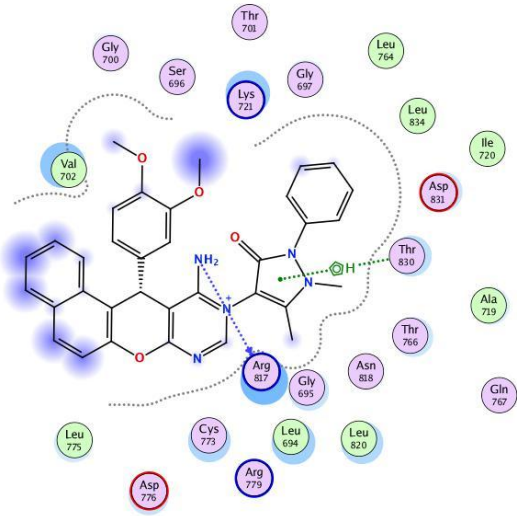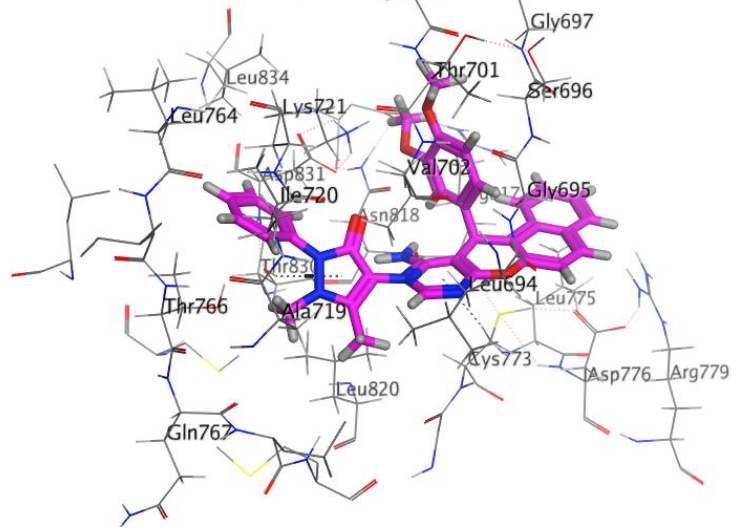

8

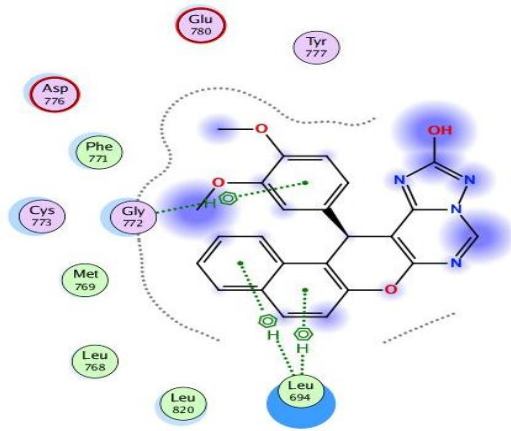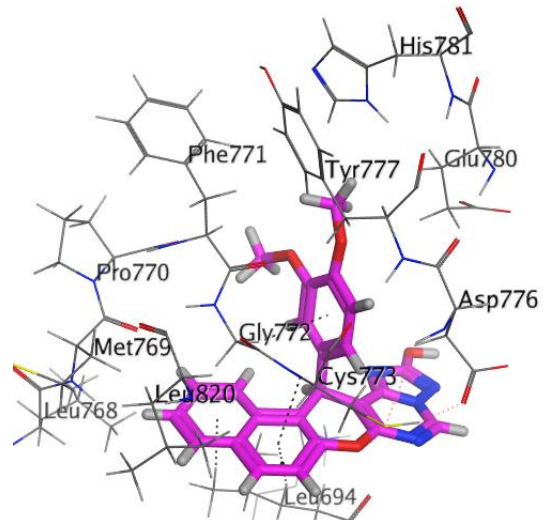

9

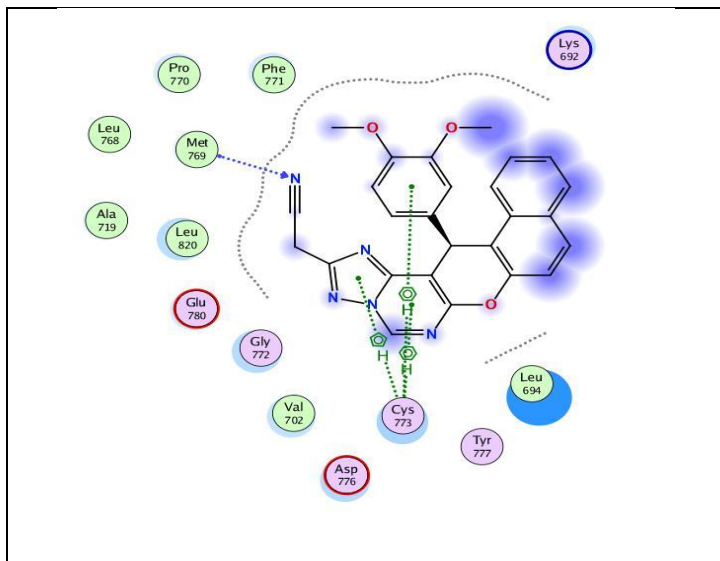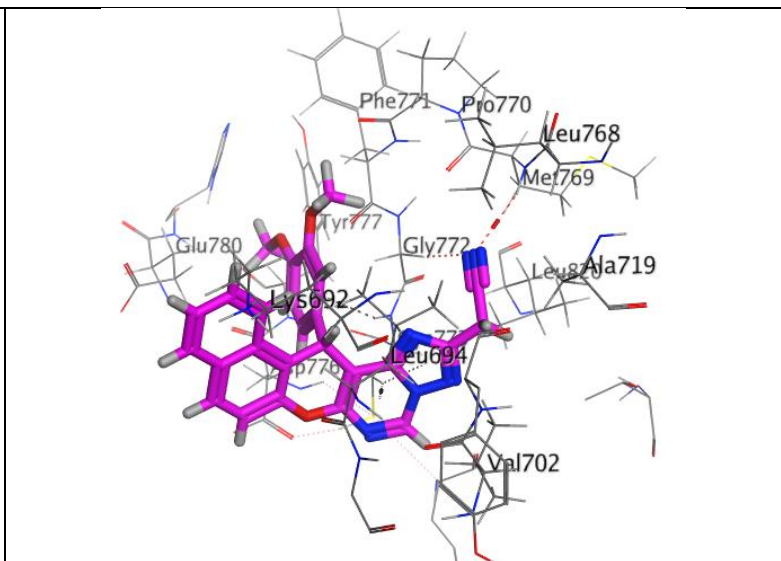

10

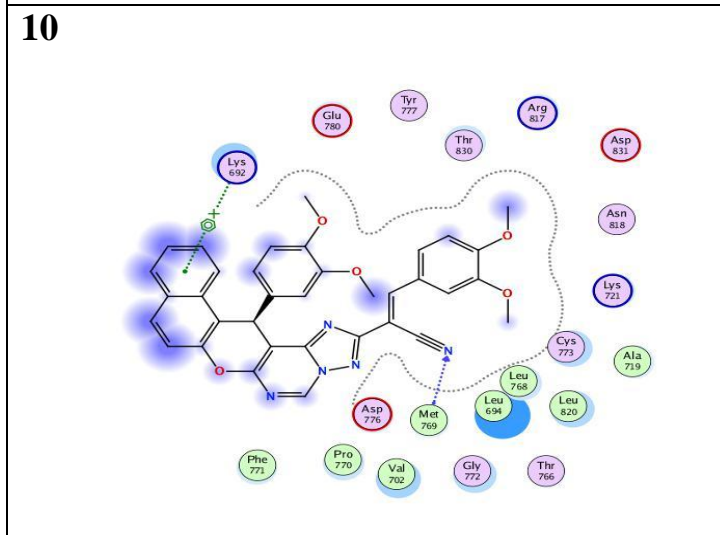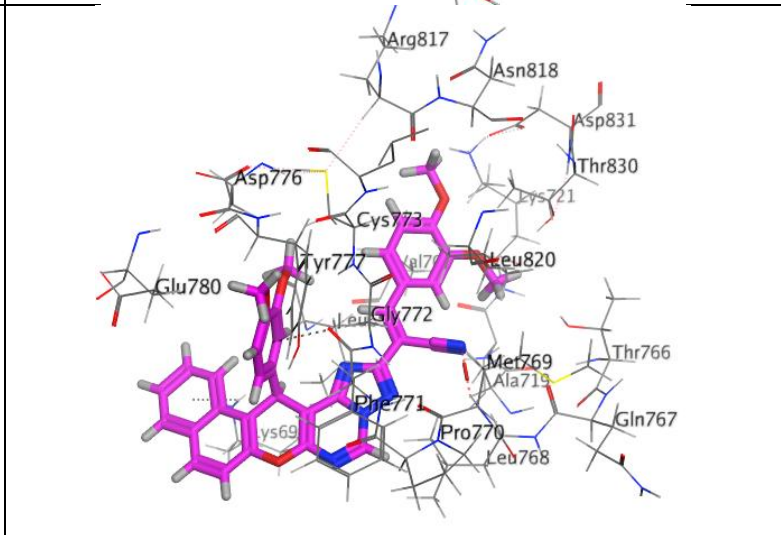

Gefitinib reference

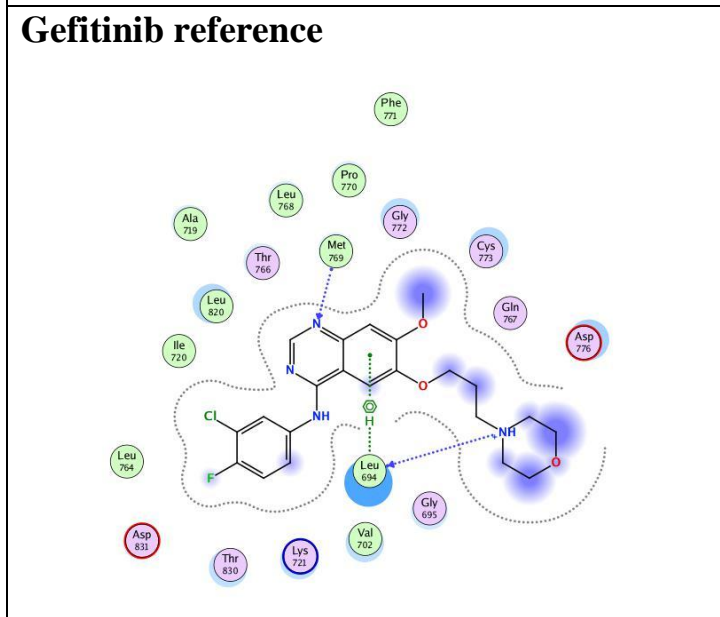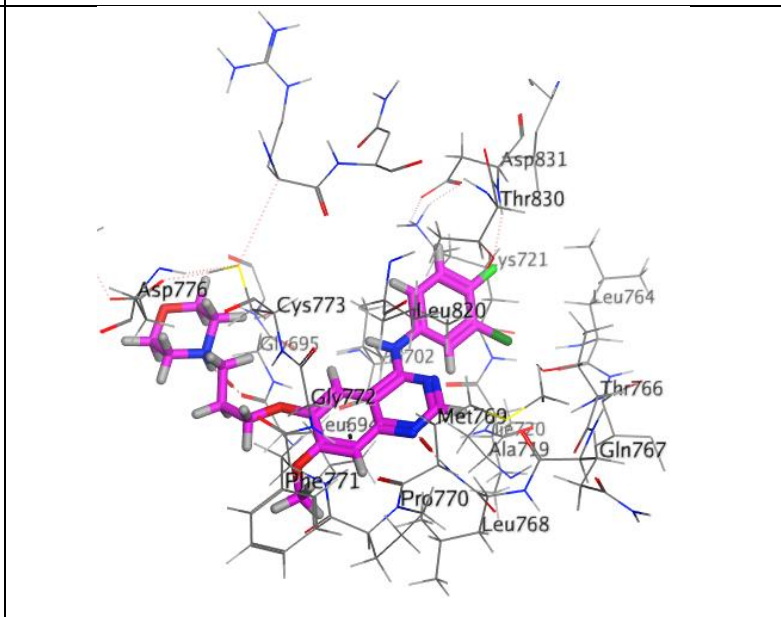

# Co-Crystallized ligand

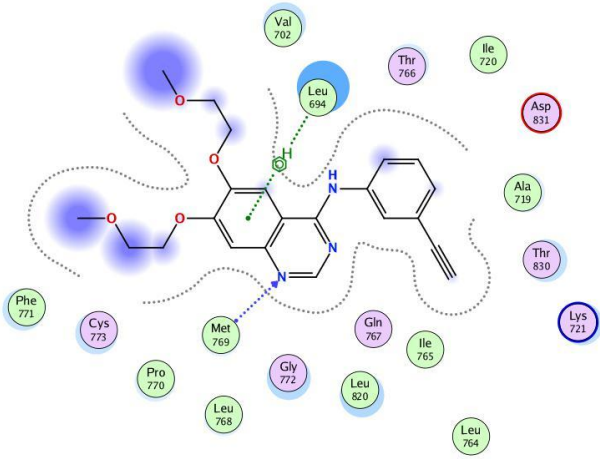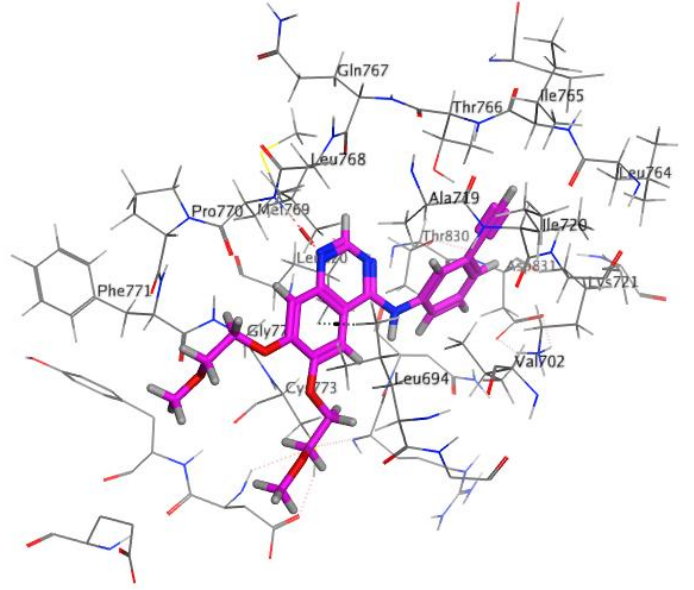

Supplement: d6ra02423h2.pdf [file d6ra02423h2.pdf]
